# Supplementary material for: Using Stakeholder Involvement, Expert Knowledge and Naturalistic Implementation to Co-Design a Complex Intervention to Support Children’s Inclusion and Participation in Schools: The CIRCLE Framework
Source: PubMed Central journal article supplement (PMC8001448; doi:10.3390/children8030217), 2021-03-11
Supplement: children-08-00217-s001.pdf [file children-08-00217-s001.pdf]

# Supplementary Materials

|                                                                                                                                        |    |
|----------------------------------------------------------------------------------------------------------------------------------------|----|
| Supplementary Material A1 Pupils in primary mainstream schools, 2007-2019 Scotland .....                                               | 2  |
| Supplementary Material A2 Pupils in secondary mainstream schools, 2007-2019, Scotland .....                                            | 3  |
| Supplementary Material A3 Pupils in primary mainstream schools, 2012, 2017, 2019, Local Authority where CIRCLE was implemented .....   | 4  |
| Supplementary Material A4 Pupils in secondary mainstream schools, 2012, 2017, 2019, Local Authority where CIRCLE was implemented ..... | 5  |
| Supplementary Material A5 CIRCLE examples ages 12-18 year (4x pages).....                                                              | 6  |
| Supplementary Material A6 CIRCLE examples ages 5-12 years (4x pages) .....                                                             | 11 |
| Supplementary Material A7 Domains, sub-domains and examples of from CIRCLE Inclusive Classroom Scale (CICS).....                       | 16 |
| Supplementary Material A8 Circle Inclusive Classroom Scale (CICS) reflective question examples .....                                   | 17 |
| Supplementary Material A9 Overview of the CIRCLE Participation Scale (CPS) .....                                                       | 18 |

## Supplementary Material A1 Pupils in primary mainstream schools, 2007-2019 Scotland

|                                                                  | 2007    | 2008    | 2009    | 2010    | 2011    | 2012    | 2013    | 2014    | 2015    | 2016    | 2017    | 2018    | 2019    |
|------------------------------------------------------------------|---------|---------|---------|---------|---------|---------|---------|---------|---------|---------|---------|---------|---------|
| <b>Total school roll</b>                                         | 375,946 | 370,839 | 367,146 | 365,326 | 366,429 | 370,680 | 377,382 | 385,212 | 391,148 | 396,697 | 400,312 | 400,276 | 398,794 |
| <b>Total pupils with any ASN <sup>1</sup></b>                    | 16,478  | 17,626  | 19,881  | 34,165  | 50,985  | 62,572  | 69,513  | 74,327  | 79,839  | 88,517  | 94,125  | 101,558 | 107,635 |
| <b>Percentage of school roll</b>                                 | 4.4     | 4.8     | 5.4     | 9.4     | 13.9    | 16.9    | 18.4    | 19.3    | 20.4    | 22.3    | 23.5    | 25.4    | 27.0    |
| <b>Estimated pupils with Neurodevelopmental ASN <sup>2</sup></b> | 9,580   | 10,247  | 11,558  | 19,862  | 29,641  | 36,377  | 40,412  | 43,211  | 46,415  | 51,461  | 54,721  | 59,042  | 62,575  |
| <b>Percentage of school roll</b>                                 | 2.6     | 2.8     | 3.2     | 5.4     | 8.1     | 9.8     | 10.7    | 11.2    | 11.9    | 13.0    | 13.7    | 14.8    | 15.7    |

<sup>1</sup> **Scottish Government Schools census [1] - Any ASN defined as:** Learning disability; Dyslexia; Other specific learning difficulty; Other moderate learning difficulty; Visual impairment; Hearing impairment; Deaf blind; Physical or motor impairment; Language or speech disorder; Autistic spectrum disorder; Social, emotional and behavioral difficulty; Physical health problem; Mental health problem; Communication Support Needs; Interrupted learning; English as an additional language; Looked after; More able pupil; Young carer; Bereavement; Substance misuse; Family issues; Risk of exclusion

<sup>2</sup> **Estimated - Neurodevelopmental ASNs are defined as:** Learning disability; Other specific learning difficulty (e.g. numeric); Other moderate learning difficulty; Language or speech disorder; Autistic spectrum disorder; Social, emotional and behavioural difficulty; Mental health problem; Communication support needs.

### Estimation methodology:

Neurodevelopmental ASNs are estimated. These categories are not presented by the Scottish government in their publically available data. In order to estimate Neurodevelopmental ASNs we used pupil level data collected from a random sample of primary schools in one large urban Local authority in Scotland (n=668 children) [2] where the proportion of Neurodevelopmental cases was identified. Using this proportion we are able to estimate Neurodevelopmental cases across Scotland in the period 2007-2019.

[1] Scottish Government. Pupil census: supplementary statistics 2007-2019. Available from <https://www.gov.scot/publications/pupil-census-supplementary-statistics/> [accessed 15/10/2020]

[2] Report details available from the authors on request

## Supplementary Material A2 Pupils in secondary mainstream schools, 2007-2019, Scotland

|                                                                  | 2007    | 2008    | 2009    | 2010    | 2011    | 2012    | 2013    | 2014    | 2015    | 2016    | 2017    | 2018    | 2019    |
|------------------------------------------------------------------|---------|---------|---------|---------|---------|---------|---------|---------|---------|---------|---------|---------|---------|
| <b>Total school roll</b>                                         | 309,560 | 303,978 | 302,921 | 301,007 | 297,109 | 293,562 | 289,164 | 284,762 | 281,939 | 280,983 | 281,993 | 286,152 | 292,063 |
| <b>Total pupils with any ASN <sup>1</sup></b>                    | 13,355  | 14,334  | 17,623  | 28,622  | 40,565  | 48,486  | 55,124  | 59,234  | 66,433  | 75,257  | 82,712  | 90,685  | 101,130 |
| <b>Percentage of school roll</b>                                 | 4.3     | 4.7     | 5.8     | 9.5     | 13.7    | 16.5    | 19.1    | 20.8    | 23.6    | 26.8    | 29.3    | 31.7    | 34.6    |
| <b>Estimated pupils with Neurodevelopmental ASN <sup>2</sup></b> | 7,764   | 8,333   | 10,245  | 16,640  | 23,583  | 28,188  | 32,047  | 34,436  | 38,622  | 43,752  | 48,086  | 52,721  | 58,793  |
| <b>Percentage of school roll</b>                                 | 2.5     | 2.7     | 3.4     | 5.5     | 7.9     | 9.6     | 11.1    | 12.1    | 13.7    | 15.6    | 17.1    | 18.4    | 20.1    |

<sup>1</sup> **Scottish Government Schools census [1] - Any ASN defined as:** Learning disability; Dyslexia; Other specific learning difficulty; Other moderate learning difficulty; Visual impairment; Hearing impairment; Deaf blind; Physical or motor impairment; Language or speech disorder; Autistic spectrum disorder; Social, emotional and behavioural difficulty; Physical health problem; Mental health problem; Communication Support Needs; Interrupted learning; English as an additional language; Looked after; More able pupil; Young carer; Bereavement; Substance misuse; Family issues; Risk of exclusion

<sup>2</sup> **Estimated - Neurodevelopmental ASNs are defined as:** Learning disability; Other specific learning difficulty (e.g. numeric); Other moderate learning difficulty; Language or speech disorder; Autistic spectrum disorder; Social, emotional and behavioural difficulty; Mental health problem; Communication support needs.

### Estimation methodology:

Neurodevelopmental ASNs are estimated. These categories are not presented by the Scottish government in their publically available data. In order to estimate Neurodevelopmental ASNs we used pupil level data collected from a random sample of primary schools in one large urban Local authority in Scotland (n=668 children) [2] where the proportion of Neurodevelopmental cases was identified. Using this proportion we are able to estimate Neurodevelopmental cases across Scotland in the period 2007-2019.

[1] Scottish Government. Pupil census: supplementary statistics 2007-2019. Available from <https://www.gov.scot/publications/pupil-census-supplementary-statistics/> [accessed 15/10/2020]

[2] Report details available from the authors on request

*Supplementary Material A3 Pupils in primary mainstream schools, 2012, 2017, 2019, Local Authority where CIRCLE was implemented*

|                                                                  | 2012   | 2017   | 2019   |
|------------------------------------------------------------------|--------|--------|--------|
| <b>Total school roll</b>                                         | 25,887 | 30,507 | 30,878 |
| <b>Total pupils with any ASN <sup>1</sup></b>                    | 4,458  | 6,763  | 11,278 |
| <b>Percentage of school roll</b>                                 | 17.2   | 22.2   | 36.5   |
| <b>Estimated pupils with Neurodevelopmental ASN <sup>2</sup></b> | 1,718  | 2,606  | 4,345  |
| <b>Percentage of school roll</b>                                 | 6.6    | 8.5    | 14.1   |

<sup>1</sup> **Scottish Government Schools census [1] - Any ASN defined as:** Learning disability; Dyslexia; Other specific learning difficulty; Other moderate learning difficulty; Visual impairment; Hearing impairment; Deaf blind; Physical or motor impairment; Language or speech disorder; Autistic spectrum disorder; Social, emotional and behavioral difficulty; Physical health problem; Mental health problem; Communication Support Needs; Interrupted learning; English as an additional language; Looked after; More able pupil; Young carer; Bereavement; Substance misuse; Family issues; Risk of exclusion

<sup>2</sup> **Estimated - Neurodevelopmental ASNs are defined as:** Learning disability; Other specific learning difficulty (e.g. numeric); Other moderate learning difficulty; Language or speech disorder; Autistic spectrum disorder; Social, emotional and behavioural difficulty; Mental health problem; Communication support needs.

*Estimation methodology:*

Neurodevelopmental ASNs are estimated. These categories are not presented by the Scottish government in their publically available data. In order to estimate Neurodevelopmental ASNs we used pupil level data collected from a random sample of primary schools in one large urban Local authority in Scotland (n=668 children) [2] where the proportion of Neurodevelopmental cases was identified. Using this proportion we are able to estimate Neurodevelopmental cases across Scotland in the period 2007-2019.

[1] Scottish Government. Pupil census: supplementary statistics 2007-2019. Available from <https://www.gov.scot/publications/pupil-census-supplementary-statistics/> [accessed 15/10/2020]

[2] Report details available from the authors on request

*Supplementary Material A4 Pupils in secondary mainstream schools, 2012, 2017, 2019, Local Authority where CIRCLE was implemented*

|                                                                  | 2012   | 2017   | 2019   |
|------------------------------------------------------------------|--------|--------|--------|
| <b>Total school roll</b>                                         | 18,505 | 18,503 | 19,772 |
| <b>Total pupils with any ASN <sup>1</sup></b>                    | 3,391  | 5,421  | 8,117  |
| <b>Percentage of school roll</b>                                 | 18.3   | 29.3   | 41.1   |
| <b>Estimated pupils with Neurodevelopmental ASN <sup>2</sup></b> | 1,307  | 2,089  | 3,127  |
| <b>Percentage of school roll</b>                                 | 7.1    | 11.3   | 15.8   |

<sup>1</sup> **Scottish Government Schools census [1] - Any ASN defined as:** Learning disability; Dyslexia; Other specific learning difficulty; Other moderate learning difficulty; Visual impairment; Hearing impairment; Deaf blind; Physical or motor impairment; Language or speech disorder; Autistic spectrum disorder; Social, emotional and behavioral difficulty; Physical health problem; Mental health problem; Communication Support Needs; Interrupted learning; English as an additional language; Looked after; More able pupil; Young carer; Bereavement; Substance misuse; Family issues; Risk of exclusion

<sup>2</sup> **Estimated - Neurodevelopmental ASNs are defined as:** Learning disability; Other specific learning difficulty (e.g. numeric); Other moderate learning difficulty; Language or speech disorder; Autistic spectrum disorder; Social, emotional and behavioural difficulty; Mental health problem; Communication support needs.

*Estimation methodology:*

Neurodevelopmental ASNs are estimated. These categories are not presented by the Scottish government in their publically available data. In order to estimate Neurodevelopmental ASNs we used pupil level data collected from a random sample of primary schools in one large urban Local authority in Scotland (n=668 children) [2] where the proportion of Neurodevelopmental cases was identified. Using this proportion we are able to estimate Neurodevelopmental cases across Scotland in the period 2007-2019.

[1] Scottish Government. Pupil census: supplementary statistics 2007-2019. Available from <https://www.gov.scot/publications/pupil-census-supplementary-statistics/> [accessed 15/10/2020]

[2] Report details available from the authors on request

*Supplementary Material A5 CIRCLE examples ages 12-18 year (4x pages)*

**CIRCLE documents are available at**

<https://www.thirdspace.scot/circle/education-resources>

## Verbal and Non-verbal Communication Skills

### Verbal and Non-verbal Communication Skills

Learner may require support with expressive or receptive aspects of communication.

Learner may require support with:

- Understanding, retaining and carrying out instructions
- Understanding and using conceptual language
- Understanding, using and recalling vocabulary and/or complex grammar that is heard or read
- Clearly expressing thoughts/ideas, verbally or in written form
- Pronouncing sounds and words and/or speaking fluently
- Social interaction, including social use of language (pragmatics) - for example, being aware of non-verbal cues such as body language, facial expression and what is being inferred
- Behaviour that may be related to frustration because of communication difficulties
- Listening

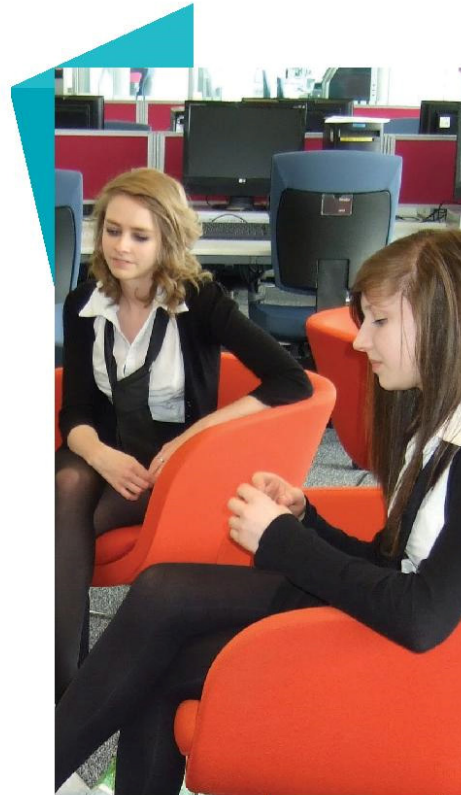

### Verbal and Non-verbal Communication Skills

## Verbal and Non-verbal Communication Skills

### Principle:

Adapting teacher's own communication style; provision of structures and environmental modifications that facilitate learners' communication, literacy and social communication skills.

- Adapt and use your own communication to facilitate that of others.
- Provide opportunities and resources that develop and support communication and social interaction skills.
- Think about how the environment (physical, sensory and social) can be used to facilitate effective communication and to support understanding.

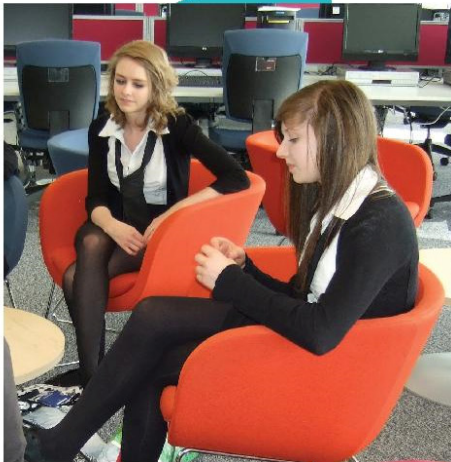

"Every now and again I have to step back and think about the vocabulary that I'm using. I know that at times I've lost learners because they don't understand, and that comes across when they ask something basic - maybe some sort of word that you'd have expected them to know, but they don't."

"Break times and other unstructured times are very difficult because of all the social communication parameters that are involved. For some, break times can be the most challenging aspect of the whole day."



## Verbal and Non-verbal Communication Skills

### Strategies

#### Modification to the Learning Environment

- ❑ Be aware of vocabulary demands of tasks. Teach and reinforce new or unfamiliar vocabulary as it arises.
- ❑ Consider reducing the rate and pace of lesson delivery and reducing language demands of tasks - for example, by decreasing length of sentences used in oral instruction and/or written texts.
- ❑ Ensure your language is clear and that it is consistent when explaining concepts.
- ❑ Explain complex language or concepts and illustrate with examples.
- ❑ Supplement verbal instructions with visual cues and demonstration.
- ❑ Use peer mentoring and buddy systems within class.
- ❑ Consider seating arrangements (proximity to supportive peers, proximity to teacher, position in relation to windows and doors, and consistency of seating).
- ❑ Use visual prompts and cues within the classroom setting to promote understanding, such as visual timetables and pictorial representation of subjects.
- ❑ Where possible, provide a calm classroom environment, keeping disruptions to a minimum.
- ❑ Use of reader/scribe/ICT as appropriate.
- ❑ Take into account sensory preferences and be aware of how sensory factors such as noise or visual stimuli may affect communication and interaction.

#### Establishing Structures and Routines

- ❑ Use visual timetable to support understanding of predictable routines and reduce anxiety.
- ❑ Use visual cues to support understanding of changes to routines to reduce anxiety.
- ❑ Provide 'get out of class early' passes for those who find transition times, such as between classes and end of day, difficult\*.
- ❑ Use consistent, clear classroom procedures, and prepare fully for any changes to regular routines.
- ❑ Check understanding regularly by asking learners to summarise what they have heard.
- ❑ Encourage use of word banks, subject glossaries and personal dictionaries.
- ❑ Use ICT that supports literacy (e.g. specific computer programmes for literacy).
- ❑ Provide support at break times to support social communication\*.
- ❑ Ensure homework is written down (consider giving printed copy).
- ❑ Set clear expectations of what is required in a writing task (e.g. full sentences or bullets, specific headings, length of piece, etc.).
- ❑ Use consistent roles in group work (e.g. note maker, reporter, discussion leader, etc.).

#### Approaches to Enhance Motivation

- ❑ Consider literacy demands and differentiate appropriately to ensure engagement.
- ❑ Facilitate use of first language when appropriate.
- ❑ Use learners interests when designing tasks.
- ❑ Encourage learners to monitor their own understanding and to ask for clarification when needed.
- ❑ Use effective questioning - for example, consider using graded and targeted questions. Give adequate 'thinking time' before expecting a verbal response.
- ❑ Use experiential or active learning techniques, such as building models or drawing, to encourage engagement.
- ❑ Use reinforcement, repetition and rephrasing.
- ❑ Facilitate positive social interaction (such as peer mentoring) or by building on learners own social groups within the wider school\*.
- ❑ Give general encouragement for desired communication.
- ❑ Practise and prepare for change and/or new experiences.

See [www.thirdspace.scot/circle](http://www.thirdspace.scot/circle) for more resources including interventions and practical supports. Copyright © 2020

\*See page 70

# Supports and Strategies Planning Page

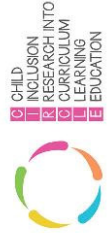

Learners Name: \_\_\_\_\_ Completed by: \_\_\_\_\_  
 Class: \_\_\_\_\_ Position: \_\_\_\_\_  
 Date: \_\_\_\_\_

|                                                   |                                                                           |                  |                                                                           |
|---------------------------------------------------|---------------------------------------------------------------------------|------------------|---------------------------------------------------------------------------|
| Summary of concerns from CPS:                     | <ul style="list-style-type: none"> <li>•</li> <li>•</li> <li>•</li> </ul> | Learner's views: | <ul style="list-style-type: none"> <li>•</li> <li>•</li> <li>•</li> </ul> |
| Most successful strategies used:                  | <ul style="list-style-type: none"> <li>•</li> <li>•</li> <li>•</li> </ul> | Learner's views: | <ul style="list-style-type: none"> <li>•</li> <li>•</li> <li>•</li> </ul> |
| Strategies to implement or use more consistently: | <ul style="list-style-type: none"> <li>•</li> <li>•</li> <li>•</li> </ul> | Learner's views: | <ul style="list-style-type: none"> <li>•</li> <li>•</li> <li>•</li> </ul> |
| Plan (What, How, Who, When)                       | <ul style="list-style-type: none"> <li>•</li> <li>•</li> <li>•</li> </ul> | Learner's views: | <ul style="list-style-type: none"> <li>•</li> <li>•</li> <li>•</li> </ul> |
| Outcome:                                          | <ul style="list-style-type: none"> <li>•</li> </ul>                       | Learner's views: | <ul style="list-style-type: none"> <li>•</li> </ul>                       |
| Next Steps:                                       | <ul style="list-style-type: none"> <li>•</li> </ul>                       | Learner's views: | <ul style="list-style-type: none"> <li>•</li> </ul>                       |

*Supplementary Material A6 CIRCLE examples ages 5-12 years (4x pages)*

**CIRCLE documents are available at**

<https://www.thirdspace.scot/circle/education-resources>

## DEXTERITY & MANIPULATION (FINE MOTOR) SKILLS

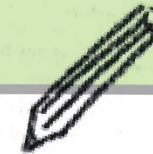

"I first noticed that **Katie** had difficulty with her fine motor skills...things like doing buttons up, writing, cutting and colouring in. It was a big effort for her. When she was writing it was like her brain was working faster than her hand. So although she had good ideas she could not get them down on paper."

"**Lucja** enjoys most activities but does not get on with pen and paper. When talking she is fluent and her understanding seems good...but when she has to write something her ability level is not reflected and her confidence drops. She has a strange pencil grip which we are working on. She seems to do much better when we do active learning or when I use the interactive whiteboard. Using different media keeps her focussed and makes the task more enjoyable and accessible for her."

Learners may need support with coordinating their hands to perform functional tasks such as dressing (e.g. fastening buttons), using learning materials and tools (e.g. pencils), or manipulating objects (e.g. toys).

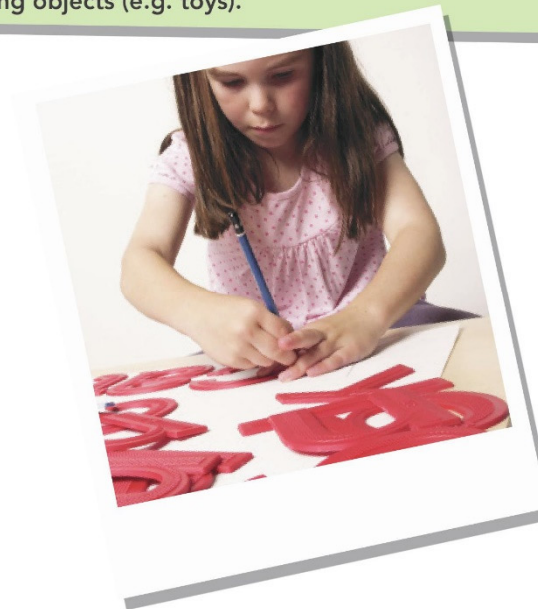

See [www.thirdspace.scot/circle](http://www.thirdspace.scot/circle) for more resources including interventions and practical supports. Copyright © 2020

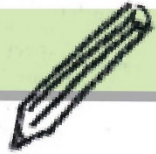

## DEXTERITY & MANIPULATION (FINE MOTOR) SKILLS

### Principle

Develop dexterity and manipulation using clear instruction, task adaptation and environmental supports.

- Consider the learning environment and resources required to support dexterity and manipulation
- Provide clear instructions of the task and regular opportunity for practice
- Ensure tasks are adapted to provide opportunity to experience success

### Parents say...

He's messy and clumsy.

He can't fasten his shoe laces or zip his jacket

She can't hold a pencil.

She can't use a knife and fork together."

Do you think he has dyspraxia?

### Education staff suggest...

"For **Katie** ... we use things like stencils for letters, different sizes and types of pencils and crayons and I've made specific worksheets for practice of letter formation - I make sure they are things that she can complete and use a sticker chart as an incentive. She also attends a small skills group 3 times a week where they work on hand strength - things like manipulating putty, squeezing close pegs, scrunching paper etc. - she really enjoys it. "

"As **Lucja** is in P7 we are now focussing on developing keyboard skills so that she can use ICT to keep up with peers in secondary school - she still struggles a bit but finds it an easier way to put ideas down on paper. I also give printed hand-outs or worksheets to minimise lengthy note taking."

"**Edward** struggles with using his hands for things like doing buttons and writing. We have tried using different pencil grips and found one which seemed to help, but he still tended to avoid writing tasks. I have recently set up a small group project where I have given him the role of project manager. He has really good ideas which he enjoys sharing with his peers and having them scribed. I have also provided a template to record bullet points from the project and he is now making more attempts to do some of the written work himself. He seems much happier and his self-esteem is being improved by the positive reinforcement he is receiving from his peers."

### Modifications to the Learning Environment

- ◆ Seating arrangements and positioning in class e.g. to ensure learner sits correctly positioned and orientated with chair pulled well into desk
- ◆ Suitable furniture e.g. correct height of chair/desk or angled writing board
- ◆ Physical supports, equipment, aids and adaptations e.g. a range of different widths, weights and textures of pens/pencils/crayons, or a chunky stylus for use with a tablet.
- ◆ Hand over hand support e.g. guide the learner's hands while they fasten their jacket
- ◆ Tactile cues and supports e.g. tracing letters in sand
- ◆ Demonstration e.g. how to catch a ball
- ◆ Break tasks down
- ◆ Additional verbal instructions to support task e.g. talk through tying their lace as they do it
- ◆ Visual cues and supports e.g. use stencils to aid letter formation
- ◆ Modify tasks specific to learner's ability
- ◆ Offer compensatory methods e.g. use of laptop or scribing
- ◆ Collaborate with parents/carers

Suitable for photocopying ©CIRCLE Collaboration all rights reserved

## DEXTERITY & MANIPULATION (FINE MOTOR) SKILLS

### SUGGESTED SUPPORTS AND STRATEGIES

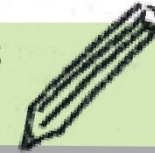

#### Establishing Structures and Routines

- ◆ Verbal rehearsal e.g. talking through how to tie shoe laces prior to doing so
- ◆ Use kinaesthetic learning routinely
- ◆ Practise desired skills with regular monitoring
- ◆ Regular specialist groups to develop dexterity and manipulation skills
- ◆ Templates e.g. to reduce the volume of written work required
- ◆ Allow extra time for completion of tasks
- ◆ Reduce the amount of work required
- ◆ Handwriting programmes
- ◆ Movement breaks e.g. 'warm up' of hands by pushing them together prior to activity
- ◆ Use routine peer support for specific activities

#### Approaches to Enhance Motivation

- ◆ Adapt tasks to ensure success e.g. allow learner to sit down when putting on their coat
- ◆ Use backward chaining to allow learner to experience success
- ◆ Use multisensory approaches to engage interest e.g. modelling with putty
- ◆ Use personalised support e.g. individualised comments or prompts to support tasks
- ◆ Give individualised attention
- ◆ Give positive praise and reinforcement
- ◆ Give general encouragement
- ◆ Reward effort not just success
- ◆ Give incentives for trying new skills
- ◆ Give learners options for presenting homework tasks using different media e.g. a mind map of a story, rather than an essay
- ◆ Use ICT to engage and sustain interest
- ◆ Develop positive peer reporting
- ◆ Gradually extend targets and expectations

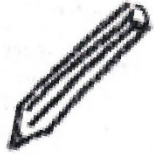

# DEXTERITY & MANIPULATION (FINE MOTOR) SKILLS

SUPPORTS AND STRATEGIES PLANNING PAGE

Learners Name .....

Class .....

Completed by .....

Position .....

Date .....

## Summary of concerns from CPS:

- 
- 
- 
- 
- 

## Most successful strategies used:

- 
- 
- 
- 
- 

## Strategies to implement or use more consistently:

- 
- 
- 
- 

## Plan (What, How, Who, When) :

- 
- 
- 
- 
- 
- 
- 
- 
- 

## Outcome:

- 
- 
- 
- 

## Next steps:

- 
- 
- 
- 

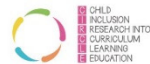

Suitable for photocopying ©CIRCLE Collaboration all rights reserved

*Supplementary Material A7 Domains, sub-domains and examples of from CIRCLE Inclusive Classroom Scale (CICS)*

| <b>Domain</b>           | <b>Sub domain</b>        | <b>Wording for of “exemplary” scoring within subdomain</b>                                                                                                              |
|-------------------------|--------------------------|-------------------------------------------------------------------------------------------------------------------------------------------------------------------------|
| Structures and routines | Decision making          | Exemplary encouragement for learners to meaningfully participate in decisions                                                                                           |
|                         | Routines                 | Structured routines all exemplary, accommodates for individual preferences, high levels of consistency, promote sense of belonging                                      |
|                         | Appeal of activities     | Very positive perception and understanding of the value of activities offered to learners, variety evident, tailored to interests/cultures                              |
|                         | Expectations             | Exceptionally clear expectations, communicated consistently by all adults in the school, and shared verbally, visually and through modeling                             |
|                         | Activity demands         | Activities promote exceptionally appropriate and creative challenge and enjoyment with excellent engagement                                                             |
| Social environment      | Empowerment              | Excellent promotion of appropriate self-direction, proactive seeking of learners views/choices                                                                          |
|                         | Provision of information | Proactive provision of information, several formats, shared and easily accessible                                                                                       |
|                         | Relationships            | Exemplary, with diverse opportunities for positive social interaction and relationship building within class, school and wider community                                |
|                         | Support and facilitation | Expert support using variety of prompts / encouragement / demonstration, adapted to individual needs, and promotes independence over time                               |
|                         | Attitudes                | Staff and peers in environment display, reinforce and value exceptional attitudes, and are highly empathic, non-judgmental                                              |
| Physical environment    | Availability of objects  | Availability of objects exemplary, storage in close proximity, objects matched to characteristics/needs/cultures of learners, independently accessible, well maintained |
|                         | Visual supports          | Excellent use of visual supports meeting individual needs, consistently used and applied                                                                                |
|                         | Sensory space            | Excellent sensory conditions, temperature pleasant, lighting and/ or noise levels optimised for sensory preferences                                                     |
|                         | Adequacy of Space        | Exemplary availability of different areas and seating for meeting needs                                                                                                 |
|                         | Accessibility of space   | Accessibility exemplary, exceptional placing of furniture, barrier free                                                                                                 |

For full measure, see <https://www.thirdspace.scot/circle/education-resources>

Pages 19-29 “Primary school resource”

Pages 43-54 “Secondary school resource”



*Supplementary Material A8 Circle Inclusive Classroom Scale (CICS) reflective question examples*

| <b>Theme</b>            | <b>Sub theme</b>         | <b>Example reflective questions for teachers to support scoring</b>                                                                                                                                 |
|-------------------------|--------------------------|-----------------------------------------------------------------------------------------------------------------------------------------------------------------------------------------------------|
| Structures and routines | Decision making          | How do you support learners to be involved in decision-making?<br>How do you ensure that everyone’s voice is heard in the decision making process?                                                  |
|                         | Routines                 | How do you support learners to understand routines and to understand changes to routines? How do you prepare learners before each change?                                                           |
|                         | Appeal of activities     | Are learners’ interests and cultures utilised when designing lessons?<br>Do good things just happen - are motivating activities timetabled across the week?                                         |
|                         | Expectations             | How do you agree expectations?<br>How are expectations communicated to learners?                                                                                                                    |
|                         | Activity demands         | Does work provide appropriate challenge and enjoyment for all? Is work differentiated to ensure achievable goals?                                                                                   |
| Social environment      | Empowerment              | How do staff assist learners in identifying and solving problems and building autonomy?<br>How do staff encourage learners to express their needs, take responsibility or be autonomous?            |
|                         | Provision of information | How is information shared with learners and parents/carers?<br>Is information for learners and parents/carers easily available in a variety of formats?                                             |
|                         | Relationships            | How would you describe the relationship of (a) learners with staff, and (b) between the learners?<br>Are activities regularly included to build relationships?                                      |
|                         | Support and facilitation | Is the pace and quantity of information giving considered?<br>Are complex instructions broken into clear steps?                                                                                     |
|                         | Attitudes                | Is sensitivity used when asking learners to ‘perform’ in front of their peers e.g. reading aloud?<br>Do adults model enthusiasm for tasks?                                                          |
| Physical environment    | Availability of objects  | Do learners have access to the equipment or resources they need?<br>Are the available objects suited to the needs of learners consider seat and table height, types of pencils, pens, scissors etc? |
|                         | Visual supports          | Is a consistent format for visuals used across the school?<br>Are visual cues and supports in place?                                                                                                |
|                         | Sensory space            | Is the environment adapted to meet sensory needs e.g. consider lighting and noise levels ?<br>Can the sensory environment be altered easily?                                                        |
|                         | Adequacy of Space        | Can you alter your classroom to suit the needs of learners?<br>Is the class set up to promote good interaction?                                                                                     |
|                         | Accessibility of space   | Can learners move around the classroom easily?<br>Can learners access other areas of the school with ease?                                                                                          |

For full measure, see <https://www.thirdspace.scot/circle/education-resources>

Pages 19-29 “Primary school resource”

Pages 43-54 “Secondary school resource”

## Supplementary Material A9 Overview of the CIRCLE Participation Scale (CPS)

| Domain                  | Description                                                                                                                                                                                                                                                                                                           | Example items                                                                                                                                                                                                                                                                                                                              |
|-------------------------|-----------------------------------------------------------------------------------------------------------------------------------------------------------------------------------------------------------------------------------------------------------------------------------------------------------------------|--------------------------------------------------------------------------------------------------------------------------------------------------------------------------------------------------------------------------------------------------------------------------------------------------------------------------------------------|
| The Environment         | <p>The physical environment refers to the physical layout of the classroom and the resources used within it.</p> <p>The social environment concerns the attitudes, expectations and actions of peers and adults.</p>                                                                                                  | <p>Sensory elements of classroom space have been considered for learner (e.g. noise, light, clutter)</p> <p>Peers include learner in play/recreation activities</p>                                                                                                                                                                        |
| Structures and routines | <p>Structures and routines are events that happen in the same way with regularity. The start, middle and end of the routine become predictable through repetition. Daily routines help learners to know and anticipate what comes next and social routines help them enjoy and interact with others.</p>              | <p>Learner is aware of and adheres to normal school Routines</p> <p>Learner is able to move between tasks, activities and/or classes during</p>                                                                                                                                                                                            |
| Motivation              | <p>Motivation, including interest when engaging with activities, self-esteem, confidence, enthusiasm and pride.</p>                                                                                                                                                                                                   | <p>Learner shows enthusiasm for activities at school</p> <p>Learner shows pride in their achievements</p>                                                                                                                                                                                                                                  |
| Skills                  | <p>Process skills (attention and concentration skills; organisation and planning skills)</p> <p>Motor skills (posture and mobility skills; dexterity and manipulation skills)</p> <p>Communication and Interaction skills (social, emotional and relationship skills; verbal and non-verbal communication skills)</p> | <p>Learner stays focused throughout an activity</p> <p>Learner keeps themselves and their workspace organised</p> <p>Learner is well co-ordinated when completing tasks</p> <p>Learner can draw/write at a level appropriate for their developmental level</p> <p>Learner verbalises their thoughts, ideas and questions appropriately</p> |

For full measure, see <https://www.thirdspace.scot/circle/education-resources>

Pages 33-39 “Primary school resource”

Pages 57-65 “Secondary school resource”
